# Supplementary material for: Multipath: An R Package to Generate Integrated Reproducible Pathway Models
Source: MDPI journal article supplement (doi:10.3390/biology9120483), 2020-12-21
Supplement: s1 [file s1]

# Package ‘Multipath’

December 10, 2020

**Type** Package

**Title** Pathway Data Integration With Influencing Knowledge Using Multi-Layered Graphs

**Version** 1.0.3

**Author** Zaynab Hammoud

**Maintainer** Zaynab Hammoud <zaynabhassanhammoud@gmail.com>

**Description** Allows the integration of pathway data with influencing knowledge from different databases, like DrugBank, Reactome and UniProt, by using multilayered graphs.

**License** GPL ( $i=2$ )

**Encoding** UTF-8

**LazyData** true

**Depends** stringr

**RoxygenNote** 7.1.1

**Suggests** knitr,  
rmarkdown

**Imports** mully ( $i=2.1.26$ ),  
UniProt.ws,  
dbparser,  
rBiopaxParser,  
TCGAREtriever,  
svMisc,  
uuid,  
dplyr,  
crayon,  
igraph,  
RCurl,  
graph

**VignetteBuilder** knitr

## R topics documented:

|                           |   |
|---------------------------|---|
| addDBLayer . . . . .      | 2 |
| addStep . . . . .         | 3 |
| addUPKBLayer . . . . .    | 4 |
| downloadPathway . . . . . | 5 |
| getAllUPKB . . . . .      | 5 |

|                       |    |
|-----------------------|----|
| getDBCarrriers        | 6  |
| getDBDrug             | 6  |
| getDBDrugInteractions | 7  |
| getDBEnzymes          | 8  |
| getDBTargets          | 8  |
| getDBtoUPKB           | 9  |
| getDBTransporters     | 9  |
| getExternalIDs        | 10 |
| getPathwayID          | 10 |
| getUPKBDBRelations    | 11 |
| getUPKBInfo           | 12 |
| getUPKBInteractions   | 12 |
| getUPKBtoDB           | 13 |
| loadDBXML             | 14 |
| multipath             | 14 |
| pathway2Mully         | 15 |
| pathwayView           | 16 |
| print.pathwayView     | 16 |
| undo                  | 17 |
| wntpathway            | 17 |

## Index 18

---

|            |                                          |
|------------|------------------------------------------|
| addDBLayer | <i>Add a drug layer to a mully graph</i> |
|------------|------------------------------------------|

---

### Description

Add a drug layer to a mully graph

### Usage

```
addDBLayer(g, data, drugList)
```

### Arguments

|                       |                                                                                                                                                    |
|-----------------------|----------------------------------------------------------------------------------------------------------------------------------------------------|
| <code>g</code>        | The mully graph                                                                                                                                    |
| <code>data</code>     | The dataframe containing the parsed information of DrugBank. This argument can be obtained using the function <code>loadDBXML(DrugBankFile)</code> |
| <code>drugList</code> | The list of DrugBank Ids of the drugs to be added. This argument can be either a string (one drug) or a list of strings (multiple drugs)           |

### Value

A mully graph with the added drug layer

### Examples

```
## Not run:
data=readDBXML(DBXMLFilePath)
g=mully("DrugBank",direct=T)
g=addDBLayer(g,data,c("DB00001","DB06605"))

## End(Not run)
```

---

addStep

*Track a modification of a graph*


---

## Description

Track a modification of a graph

## Usage

```
addStep(
  v,
  action,
  element,
  name = NA,
  layername = NA,
  V1 = NA,
  V2 = NA,
  attributes = NA,
  multi = F,
  trans = T
)
```

## Arguments

|                         |                                                                                                                                                                                                            |
|-------------------------|------------------------------------------------------------------------------------------------------------------------------------------------------------------------------------------------------------|
| <code>v</code>          | The input view in which the modification should be saved                                                                                                                                                   |
| <code>action</code>     | The type of action to be applied. Can either be "add" or "remove"                                                                                                                                          |
| <code>element</code>    | The type of the element to be modified. Can either be "node", "edge", or "layer"                                                                                                                           |
| <code>name</code>       | The name of the element to be modified. This argument is only mandatory for nodes and edges                                                                                                                |
| <code>layername</code>  | The layer name. This argument is only mandatory for action "add" and element "node"                                                                                                                        |
| <code>V1</code>         | The start node of an edge. This argument is only mandatory for element "edge"                                                                                                                              |
| <code>V2</code>         | The end node of an edge. This argument is only mandatory for element "edge"                                                                                                                                |
| <code>attributes</code> | The named list of attributes of the element. This argument is required only for action "add". It is optional for both elements "node" and "edge", but mandatory if the edge already exists                 |
| <code>multi</code>      | A boolean whether to select multi-edges or not. This is only mandatory for action "remove" and element "edge". By default set to FALSE, in which case the attributes of the specified edge should be given |
| <code>trans</code>      | A boolean whether to add transitive edges upon removal of nodes or layers                                                                                                                                  |

## Value

The View with the added step

**Examples**

```
## Not run:
g=mully::demo()
view=pathwayView(g,"View1")
view=addStep(view,"remove","layer","")

## End(Not run)
```

---

addUPKBLayer

---

*Add a protein layer to a mully graph*


---

**Description**

Add a protein layer to a mully graph

**Usage**

```
addUPKBLayer(
  g,
  up,
  proteinList,
  col = c("UNIPROTKB", "PROTEIN-NAMES", "ORGANISM")
)
```

**Arguments**

|                          |                                                                            |
|--------------------------|----------------------------------------------------------------------------|
| <code>g</code>           | The mully graph                                                            |
| <code>up</code>          | The UniProt.ws Object                                                      |
| <code>proteinList</code> | The list of UniProt Ids of the proteins to be added                        |
| <code>col</code>         | The list of attributes associated to the UniProtKB Entries to be retrieved |

**Value**

The mully graph with the added UniProt layer

**Note**

Should be preceded by UniProt.ws() to get the UniProt.ws Object

**Examples**

```
## Not run:
up=UniProt.ws()
g=mully("UniProt")
g=addUPKBLayer(g,up,proteinList=c("P02747", "P00734", "P07204"),col=c("UNIPROTKB", "PROTEIN-NAMES"))

## End(Not run)
```

---

|                 |                                                           |
|-----------------|-----------------------------------------------------------|
| downloadPathway | <i>Download Reactome Pathways in BioPAX level 2 and 3</i> |
|-----------------|-----------------------------------------------------------|

---

**Description**

Download Reactome Pathways in BioPAX level 2 and 3

**Usage**

```
downloadPathway(pathwayID, biopaxLevel = "3", destDirectory, overwrite = F)
```

**Arguments**

|               |                                                                                                                                                                  |
|---------------|------------------------------------------------------------------------------------------------------------------------------------------------------------------|
| pathwayID     | The Reactome ID or list of IDs of the pathways to be downloaded. The ID should start with R-HSA-.                                                                |
| biopaxLevel   | The BioPAX Level, 2 or 3. By default set to 3.                                                                                                                   |
| destDirectory | The Directory in which the Pathway Files should be saved. If missing, the files are saved in the working directory. The Reactome IDs are used to name the files. |
| overwrite     | A Boolean whether to overwrite existing files with the same name.                                                                                                |

**Value**

The Directory in which the files are saved.

**Examples**

```
## Not run:
downloadPathway(c("R-HSA-195721", "R-HSA-9609507"), biopaxLevel=3, overwrite=T)

## End(Not run)
```

---

|            |                                               |
|------------|-----------------------------------------------|
| getAllUPKB | <i>Get all proteins' entries from UniProt</i> |
|------------|-----------------------------------------------|

---

**Description**

Get all proteins' entries from UniProt

**Usage**

```
getAllUPKB(up)
```

**Arguments**

|    |                       |
|----|-----------------------|
| up | The UniProt.ws Object |
|----|-----------------------|

**Value**

a dataframe containing the Protein's entries with the ID and Name

**Note**

Should be preceded by UniProt.ws() to get the UniProt.ws Object

**Examples**

```
## Not run:
up=UniProt.ws()
allProteins=getAllUPKB(up)

## End(Not run)
```

---

|               |                                                                                                 |
|---------------|-------------------------------------------------------------------------------------------------|
| getDBCarriers | <i>Get the carrier proteins involved in movement of given drugs across biological membranes</i> |
|---------------|-------------------------------------------------------------------------------------------------|

---

**Description**

Get the carrier proteins involved in movement of given drugs across biological membranes

**Usage**

```
getDBCarriers(data, drugList)
```

**Arguments**

|          |                                                                                                                                       |
|----------|---------------------------------------------------------------------------------------------------------------------------------------|
| data     | The dataframe containing the parsed information of DrugBank. This argument can be obtained using the function loadDBXML(DrugBankFile) |
| drugList | The list of DrugBank Ids of the drugs. This argument can be either a string (one drug) or a list of strings (multiple drugs)          |

**Value**

A dataframe containing all information on the carrier proteins involved in movement of the given drugs across biological membranes

---

|           |                                |
|-----------|--------------------------------|
| getDBDrug | <i>Get DrugBank drug entry</i> |
|-----------|--------------------------------|

---

**Description**

Get DrugBank drug entry

**Usage**

```
getDBDrug(data, drug)
```

**Arguments**

|      |                                                                                                                                       |
|------|---------------------------------------------------------------------------------------------------------------------------------------|
| data | The dataframe containing the parsed information of DrugBank. This argument can be obtained using the function loadDBXML(DrugBankFile) |
| drug | The ID or list of IDs of the DrugBank drug entries starting with "DB"                                                                 |

**Value**

A dataframe containing the DrugBank entry with its information

**Examples**

```
## Not run:  
data=loadDBXML(DrugBankFilePath)  
getDBDrug(data, "DB00001")  
  
## End(Not run)
```

---

getDBDrugInteractions    *Get DrugBank Drug to Drug Interactions*

---

**Description**

Get DrugBank Drug to Drug Interactions

**Usage**

```
getDBDrugInteractions(data, drug)
```

**Arguments**

|      |                                                                                                                                              |
|------|----------------------------------------------------------------------------------------------------------------------------------------------|
| data | The dataframe containing the parsed information of DrugBank. This argument can be obtained using the function loadDBXML(DrugBankFile)        |
| drug | The ID of the DrugBank drug entry starting with "DB". This argument can be either a string (one drug) or a list of strings (multiple drugs). |

**Value**

A dataframe containing the DrugBank interactions in which the given drug is involved

**Examples**

```
## Not run:  
data=loadDBXML(DBXMLFilePath)  
getDBDrugInteractions(data,"DB06605")  
  
## End(Not run)
```

---

|              |                                                                                            |
|--------------|--------------------------------------------------------------------------------------------|
| getDBEnzymes | <i>Get the enzymes inhibited/induced or involved in metabolism by given DrugBank drugs</i> |
|--------------|--------------------------------------------------------------------------------------------|

---

**Description**

Get the enzymes inhibited/induced or involved in metabolism by given DrugBank drugs

**Usage**

```
getDBEnzymes(data, drugList)
```

**Arguments**

|          |                                                                                                                                       |
|----------|---------------------------------------------------------------------------------------------------------------------------------------|
| data     | The dataframe containing the parsed information of DrugBank. This argument can be obtained using the function loadDBXML(DrugBankFile) |
| drugList | The list of DrugBank Ids of the drugs. This argument can be either a string (one drug) or a list of strings (multiple drugs)          |

**Value**

A dataframe containing all information on the enzymes inhibited/induced or involved in metabolism by the given drug list

---

|              |                                                |
|--------------|------------------------------------------------|
| getDBTargets | <i>Get the targets of given DrugBank drugs</i> |
|--------------|------------------------------------------------|

---

**Description**

Get the targets of given DrugBank drugs

**Usage**

```
getDBTargets(data, drugList)
```

**Arguments**

|          |                                                                                                                                       |
|----------|---------------------------------------------------------------------------------------------------------------------------------------|
| data     | The dataframe containing the parsed information of DrugBank. This argument can be obtained using the function loadDBXML(DrugBankFile) |
| drugList | The list of DrugBank Ids of the drugs. This argument can be either a string (one drug) or a list of strings (multiple drugs)          |

**Value**

A dataframe containing all information on the targets of the given drug list



---

|             |                                                                        |
|-------------|------------------------------------------------------------------------|
| getDBtoUPKB | <i>Get DrugBank Drugs to UniProt Proteins Relations from Drug-Bank</i> |
|-------------|------------------------------------------------------------------------|

---

### Description

Get DrugBank Drugs to UniProt Proteins Relations from DrugBank

### Usage

```
getDBtoUPKB(data, drugList, proteinList)
```

### Arguments

|             |                                                                                                                                       |
|-------------|---------------------------------------------------------------------------------------------------------------------------------------|
| data        | The dataframe containing the parsed information of DrugBank. This argument can be obtained using the function loadDBXML(DrugBankFile) |
| drugList    | The list of DrugBank Ids of the drugs. This argument can be either a string (one drug) or a list of strings (multiple drugs)          |
| proteinList | The list of UniProt Ids of the proteins                                                                                               |

### Value

A dataframe containing the connections between DrugBank drugs and UniProt proteins retrieved from DrugBank

### Examples

```
## Not run:
data=readDBXML(DBXMLFilePath)
getDBtoUPKB(data,c("DB00001","DB00002","DB00006"),c("P02747","P00734","P07204","P05164"))

## End(Not run)
```

---

|                   |                                                                                                     |
|-------------------|-----------------------------------------------------------------------------------------------------|
| getDBTransporters | <i>Get the transporter proteins involved in movement of given drugs across biological membranes</i> |
|-------------------|-----------------------------------------------------------------------------------------------------|

---

### Description

Get the transporter proteins involved in movement of given drugs across biological membranes

### Usage

```
getDBTransporters(data, drugList)
```

### Arguments

|          |                                                                                                                                       |
|----------|---------------------------------------------------------------------------------------------------------------------------------------|
| data     | The dataframe containing the parsed information of DrugBank. This argument can be obtained using the function loadDBXML(DrugBankFile) |
| drugList | The list of DrugBank Ids of the drugs. This argument can be either a string (one drug) or a list of strings (multiple drugs)          |

**Value**

A dataframe containing all information on the transporter proteins involved in movement of the given drugs across biological membranes

---

|                |                                           |
|----------------|-------------------------------------------|
| getExternalIDs | <i>Get External Database IDs of nodes</i> |
|----------------|-------------------------------------------|

---

**Description**

Get External Database IDs of nodes

**Usage**

```
getExternalIDs(biopax, nodes, database)
```

**Arguments**

|          |                                       |
|----------|---------------------------------------|
| biopax   | The biopax object                     |
| nodes    | The list of internal IDs of the nodes |
| database | The name of the database              |

**Value**

A dataframe with the mappings between the internal and external IDs

**Examples**

```
## Not run:
biopax=readBiopax(pi3k.owl)
getExternalIDs(wntBiopax,c("Protein1","Protein2"),"UniProt")

## End(Not run)
```

---

|              |                                                 |
|--------------|-------------------------------------------------|
| getPathwayID | <i>Get internal pathway ID in a BioPAX file</i> |
|--------------|-------------------------------------------------|

---

**Description**

Get internal pathway ID in a BioPAX file

**Usage**

```
getPathwayID(biopax, reactomeID)
```

**Arguments**

|            |                                |
|------------|--------------------------------|
| biopax     | The biopax object              |
| reactomeID | The Reactome ID of the pathway |

**Value**

The internal ID of the pathway in the parsed BioPAX object

**Note**

This should be preceded by readBiopax(filepath) to obtain the biopax object

**Examples**

```
## Not run:
biopax=readBiopax(pi3k.owl)
id=getPathwayID(biopax,"R-HSA-167057")
pi3kmully=pathway2mully(biopax,id)

## End(Not run)
```

---

|                    |                                                                  |
|--------------------|------------------------------------------------------------------|
| getUPKBDBRelations | <i>Get Protein and Drugs relations from UniProt and DrugBank</i> |
|--------------------|------------------------------------------------------------------|

---

**Description**

Get Protein and Drugs relations from UniProt and DrugBank

**Usage**

```
getUPKBDBRelations(up, data, proteinList, drugList)
```

**Arguments**

|             |                                                                                                                                       |
|-------------|---------------------------------------------------------------------------------------------------------------------------------------|
| up          | The UniProt.ws Object                                                                                                                 |
| data        | The dataframe containing the parsed information of DrugBank. This argument can be obtained using the function loadDBXML(DrugBankFile) |
| proteinList | The list of UniProt Ids of the proteins                                                                                               |
| drugList    | The list of DrugBank Ids of the drugs. This argument can be either a string (one drug) or a list of strings (multiple drugs)          |

**Value**

A dataframe containing the connections between DrugBank drugs and UniProt proteins retrieved from DrugBank and UniProt

**Note**

Should be preceded by: 1. UniProt.ws() to get the UniProt.ws Object 2. loadDBXML(DrugBankFile) to get the argument data

**Examples**

```
## Not run:
up=UniProt.ws()
data=readDBXML(DBXMLFilePath)
relations=getUPKBDBRelations(up,data,c("P02747","P05164"),c("DB00001","DB00006"))

## End(Not run)
```

---

getUPKBInfo

*Get Proteins from UniProtKB*


---

**Description**

Get Proteins from UniProtKB

**Usage**

```
getUPKBInfo(up, proteins, col)
```

**Arguments**

|          |                                                                            |
|----------|----------------------------------------------------------------------------|
| up       | The UniProt.ws Object                                                      |
| proteins | The list of UniProtKB Proteins ID to be retrieved                          |
| col      | The list of attributes associated to the UniProtKB Entries to be retrieved |

**Value**

a dataframe containing the protein entries with the selected attributes

**Note**

Should be preceded by UniProt.ws() to get the UniProt.ws Object To get the list of possible columns, you can call columns(UniProt.ws())

**Examples**

```
## Not run:
up <- UniProt.ws()
getUPKBInfo(up, c("Q6ZS62", "P14384"), c("PROTEIN-NAMES", "GO"))

## End(Not run)
```

---

getUPKBInteractions

*Get the interactions of given proteins from UniProt*


---

**Description**

Get the interactions of given proteins from UniProt

**Usage**

```
getUPKBInteractions(up, proteins)
```

**Arguments**

|          |                                                                    |
|----------|--------------------------------------------------------------------|
| up       | The UniProt.ws Object                                              |
| proteins | The list of proteins of which the interactions should be retrieved |

**Value**

A dataframe containing the interactions between the given proteins

**Note**

Should be preceded by UniProt.ws() to get the UniProt.ws Object

**Examples**

```
## Not run:
up=UniProt.ws()
interactions=getUPKBInteractions(up,c("P02747","P07204","P00734"))

## End(Not run)
```

---

getUPKBtoDB

*Get UniProt Proteins to DrugBank Drugs relations from UniProt*


---

**Description**

Get UniProt Proteins to DrugBank Drugs relations from UniProt

**Usage**

```
getUPKBtoDB(up, proteinList, drugList)
```

**Arguments**

|             |                                                                                                                                              |
|-------------|----------------------------------------------------------------------------------------------------------------------------------------------|
| up          | The UniProt.ws Object                                                                                                                        |
| proteinList | The list of UniProt Ids of the proteins                                                                                                      |
| drugList    | The ID of the DrugBank drug entry starting with "DB". This argument can be either a string (one drug) or a list of strings (multiple drugs). |

**Value**

A dataframe containing the connections between UniProt proteins and DrugBank drugs retrieved from UniProt

**Note**

Should be preceded by UniProt.ws() to get the UniProt.ws Object

**Examples**

```
## Not run:
up=UniProt.ws()
getUPKBtoDB(up,c("P02747","P00734","P07204"),c("DB00001","DB00002"))

## End(Not run)
```

---

|           |                               |
|-----------|-------------------------------|
| loadDBXML | <i>Load DrugBank XML file</i> |
|-----------|-------------------------------|

---

### Description

Load DrugBank XML file

### Usage

```
loadDBXML(file)
```

### Arguments

|      |                                                                                                                                                                  |
|------|------------------------------------------------------------------------------------------------------------------------------------------------------------------|
| file | The path to the DrugBank XML file. This can be downloaded from the DrugBank official Website (drugbank.ca). An account with an institutional e-mail is required. |
|------|------------------------------------------------------------------------------------------------------------------------------------------------------------------|

### Value

A dataframe containing the parsed information from DrugBank. This can be used to extract any additional information on the DrugBank entries

### Note

This function should be called before using any function to query the DrugBank database. Since the parsing of DrugBank takes time, this function should only be called once.

---

|           |                                                   |
|-----------|---------------------------------------------------|
| multipath | <i>Generate Multipath Graph from General Data</i> |
|-----------|---------------------------------------------------|

---

### Description

Generate Multipath Graph from General Data

### Usage

```
multipath(  
  name = "Multipath",  
  up = NA,  
  proteinList = NA,  
  data = NA,  
  drugList = NA  
)
```

**Arguments**

|             |                                                                                                                                       |
|-------------|---------------------------------------------------------------------------------------------------------------------------------------|
| name        | The name of the graph to be generated                                                                                                 |
| up          | The Uniprot.ws() object                                                                                                               |
| proteinList | The list of proteins of which the interactions should be retrieved                                                                    |
| data        | The dataframe containing the parsed information of DrugBank. This argument can be obtained using the function loadDBXML(DrugBankFile) |
| drugList    | The list of DrugBank Ids of the drugs. This argument can be either a string (one drug) or a list of strings (multiple drugs)          |

**Value**

A mully graph with the added data

---

|               |                                                 |
|---------------|-------------------------------------------------|
| pathway2Mully | <i>Build a mully graph from a given pathway</i> |
|---------------|-------------------------------------------------|

---

**Description**

Build a mully graph from a given pathway

**Usage**

```
pathway2Mully(biopax, pathwayID)
```

**Arguments**

|           |                                                                                                                |
|-----------|----------------------------------------------------------------------------------------------------------------|
| biopax    | The BioPaX object containing the parsed data from an OWL file. This can be obtained using readBiopax(filepath) |
| pathwayID | The ID of the pathway in the biopax object                                                                     |

**Value**

A mully graph built from the given pathway

**Note**

This should be preceded by readBiopax(filepath) to obtain the biopax object

**Examples**

```
## Not run:
biopax=readBiopax(pi3k.owl)
pi3kmully=pathway2mully(biopax,"pathway1")

## End(Not run)
```

---

|             |                      |
|-------------|----------------------|
| pathwayView | Create an empty view |
|-------------|----------------------|

---

**Description**

Create an empty view

**Usage**

```
pathwayView(g, name)
```

**Arguments**

|      |                      |
|------|----------------------|
| g    | The input graph      |
| name | The name of the view |

**Value**

An empty view

**Examples**

```
## Not run:  
view=pathwayView(mully("myMully",T),"View1")  
  
## End(Not run)
```

---

|                   |                |
|-------------------|----------------|
| print.pathwayView | Print function |
|-------------------|----------------|

---

**Description**

Print function

**Usage**

```
## S3 method for class 'pathwayView'  
print(x, ...)
```

**Arguments**

|     |                                       |
|-----|---------------------------------------|
| x   | The input View to be printed          |
| ... | any other parameteres passed to print |



---

|      |                                           |
|------|-------------------------------------------|
| undo | <i>Undo a modification step in a view</i> |
|------|-------------------------------------------|

---

**Description**

Undo a modification step in a view

**Usage**

```
undo(v, stps = 1)
```

**Arguments**

|      |                                                                                                                                                                    |
|------|--------------------------------------------------------------------------------------------------------------------------------------------------------------------|
| v    | The input view                                                                                                                                                     |
| stps | The number of steps to undo. This number refers to the number of unique steps' IDs to be removed, i.e. entries of steps in the view with similar stepID count as 1 |

**Value**

The view with the undone modifications

---

|            |                                            |
|------------|--------------------------------------------|
| wntpathway | <i>Demo function for Wnt Pathway Views</i> |
|------------|--------------------------------------------|

---

**Description**

Demo function for Wnt Pathway Views

**Usage**

```
wntpathway(file)
```

**Arguments**

|      |                                         |
|------|-----------------------------------------|
| file | The link to the Wnt Pathway biopax file |
|------|-----------------------------------------|

# Index

addDBLayer, [2](#)  
addStep, [3](#)  
addUPKBLayer, [4](#)  
  
downloadPathway, [5](#)  
  
getAllUPKB, [5](#)  
getDBCarriers, [6](#)  
getDBDrug, [6](#)  
getDBDrugInteractions, [7](#)  
getDBEnzymes, [8](#)  
getDBTargets, [8](#)  
getDBtoUPKB, [9](#)  
getDBTransporters, [9](#)  
getExternalIDs, [10](#)  
getPathwayID, [10](#)  
getUPKBDDBRelations, [11](#)  
getUPKBInfo, [12](#)  
getUPKBInteractions, [12](#)  
getUPKBtoDB, [13](#)  
  
loadDBXML, [14](#)  
  
multipath, [14](#)  
  
pathway2Mully, [15](#)  
pathwayView, [16](#)  
print.pathwayView, [16](#)  
  
undo, [17](#)  
  
wntpathway, [17](#)
